# Supplementary material
Source: publisher site journal article supplement (https://www.dovepress.com/article/488480)
Supplement: Supplementary file 1 [file get_supplementary_file.php]

**Supporting Figures**


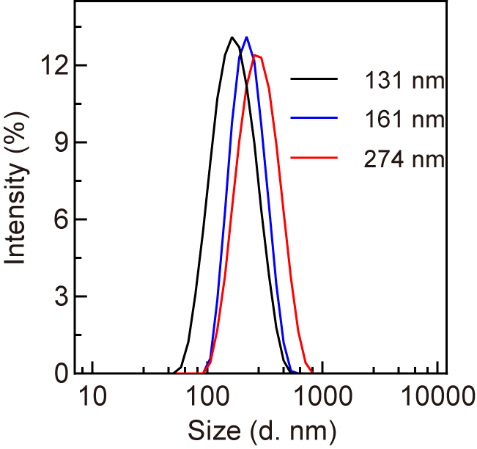


**Figure S1** Hydrodynamic size distributions of TiN NBPs.


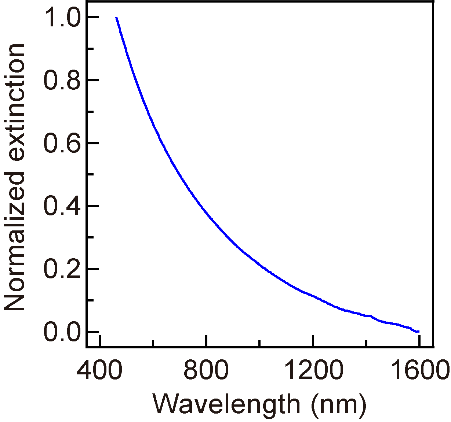


**Figure S2** Extinction spectrum of the carbon NPs in aqueous solution.


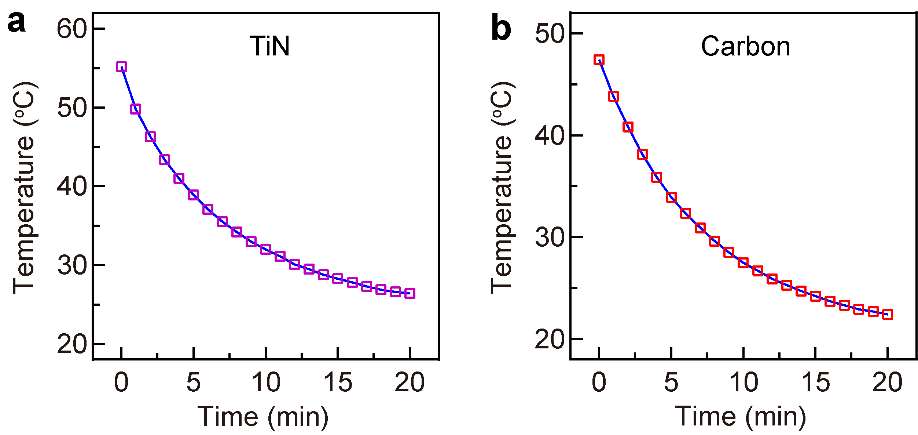


**Figure S3** Temperature decay curves. (a) TiN NBPs. (b) Carbon NPs. The data points (color squares) were measured during the cooling process after the TiN NBP (2 mL, 286 μg mL−1) or carbon NP (2 mL, 100 μg mL−1) solution was irradiated with a 1064 nm laser at 0.8 W for 20 min. The blue line was obtained from fitting.


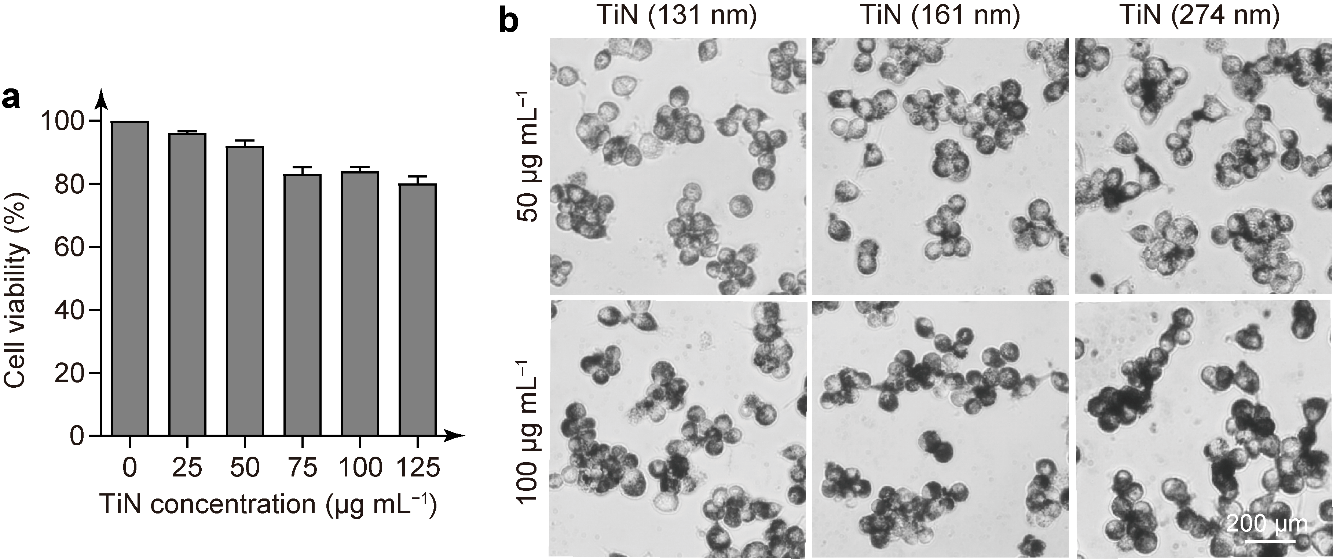


**Figure S4** Cytotoxicity and cellular uptake of the TiN NBPs. (a) Effect of the TiN NBPs at different concentrations (25–125 μg mL−1) on the viability of RAW 264.7 cells. (b) Effect of the size (131, 161, 274 nm) on the cellular uptake of the TiN NBPs in RAW 264.7cells.


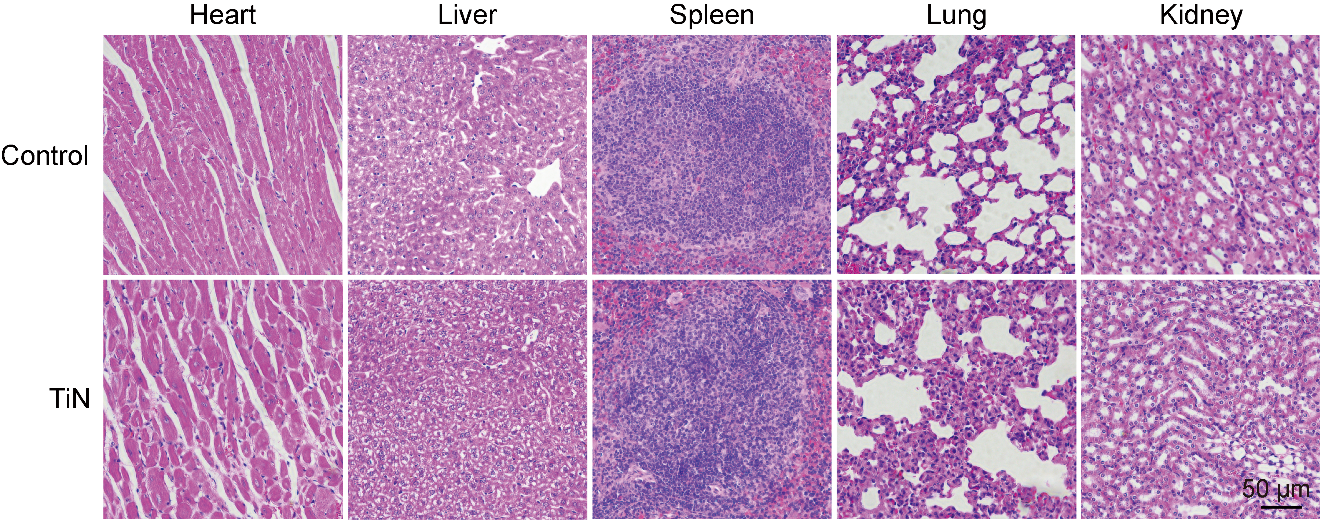


**Figure S5** H&E staining of the tissue slices from the major organs (heart, liver, spleen, lung, and kidney) in the mice treated with the TiN NBPs. The mice were subcutaneously injected with the polyethylene glycol-dopamine-coated TiN NBPs (50 mg kg−1) at the right hindfoot paws. The mice were sacrificed after 24 h and the major organs were harvested. H&E staining was performed.


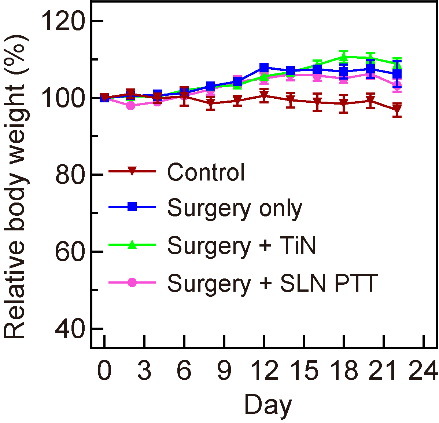


**Figure S6** Relative body weights of the mice after various treatments.
